# Supplementary material for: Controlled synthesis of water-compatible molecularly imprinted polymer microspheres with ultrathin hydrophilic polymer shells via surface-initiated reversible addition-fragmentation chain transfer polymerization
Source: Royal Society of Chemistry journal article supplement (doi:10.1039/c1sm05497j), 2011-01-01
Supplement: c1sm05497j.pdf [file c1sm05497j.pdf]

## *Supporting Information*

### **Controlled synthesis of water-compatible molecularly imprinted polymer microspheres with ultrathin hydrophilic polymer shells via surface-initiated reversible addition-fragmentation chain transfer polymerization**

Guoqing Pan, Yue Ma, Ying Zhang, Xianzhi Guo, Chenxi Li and Huiqi Zhang\*

*Key Laboratory of Functional Polymer Materials (Nankai University), Ministry of Education,  
Department of Chemistry, Nankai University, Weijin Road 94, Tianjin 300071, PR China*

*Tel/Fax: +86-2223507193; E-mail: zhanghuiqi@nankai.edu.cn*

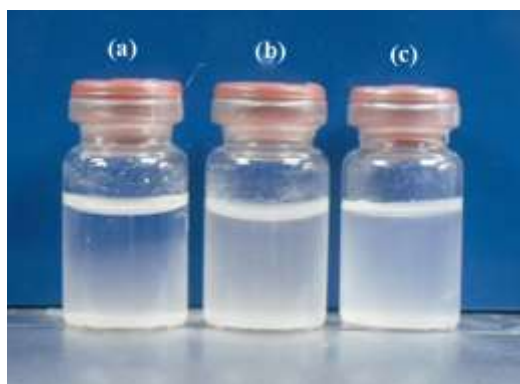

**Fig. S1** The photographs for the dispersion of the ungrafted MIP (a), B-MIP-12h (b), and H-MIP-12h (c) microspheres in pure water (1 mg/mL) at 20 °C (after settling down for 2 h).

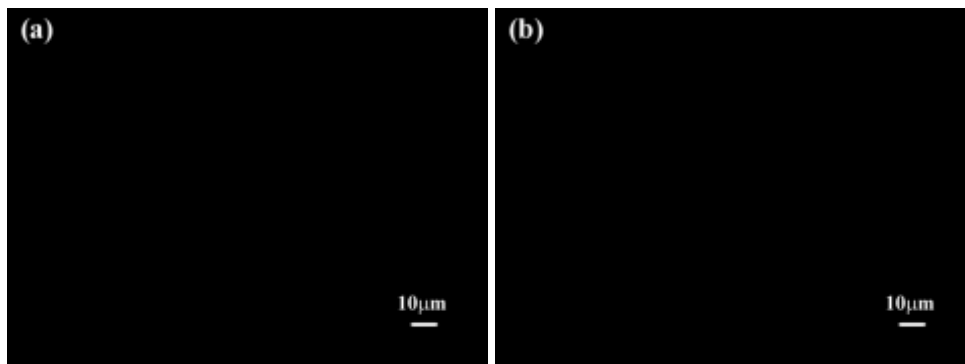

**Fig. S2** Fluorescence microscopy images of the ungrafted MIP microspheres after their control Rhodamine B-labeling treatment (a) and the unlabeled B-MIP-24h microspheres (b).

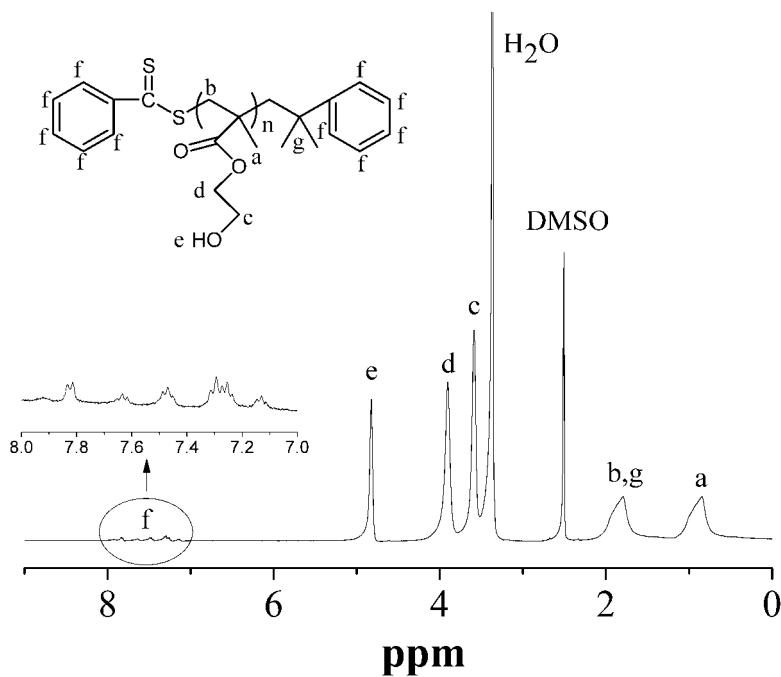

**Fig. S3** <sup>1</sup>H NMR spectrum (solvent: DMSO-d<sub>6</sub>) of the free PHEMA ( $M_{n,NMR} = 1.59 \times 10^4$ ) generated during the surface-initiated RAFT polymerization of HEMA.
